# Supplementary material for: Mycoplasma Co-Infection Is Associated with Cervical Cancer Risk
Source: PubMed Central journal article supplement (PMC7281224; doi:10.3390/cancers12051093), 2020-04-28
Supplement: cancers-12-01093-s001.pdf [file cancers-12-01093-s001.pdf]

A

**Tests of Between-Subjects Effects**

| Source          | Dependent Variable | Type III Sum of Squares <sup>a</sup> | df      | Mean Square | F         | Sig.    | Partial Eta Squared | Noncent. Parameter | Observed Power <sup>b</sup> |       |
|-----------------|--------------------|--------------------------------------|---------|-------------|-----------|---------|---------------------|--------------------|-----------------------------|-------|
| Corrected Model | Ureaplasma spp.    | 1.391 <sup>a</sup>                   | 4       | .348        | 1.393     | .234    | .006                | 5.573              | .437                        |       |
|                 | M. hominis         | .251 <sup>b</sup>                    | 4       | .063        | .279      | .892    | .001                | 1.116              | .112                        |       |
|                 | M. genitalium      | .052 <sup>c</sup>                    | 4       | .013        | .628      | .643    | .003                | 2.511              | .207                        |       |
|                 | L. lieri           | 1.063 <sup>d</sup>                   | 4       | .266        | 1.416     | .226    | .006                | 5.665              | .444                        |       |
|                 | HPV                | 5.369 <sup>e</sup>                   | 4       | 1.347       | 5.510     | .000    | .022                | 22.042             | .977                        |       |
|                 | HSV                | .452 <sup>f</sup>                    | 4       | .113        | .772      | .543    | .003                | 3.090              | .250                        |       |
|                 | Age                | 456.037 <sup>g</sup>                 | 4       | 114.009     | 1.223     | .299    | .005                | 4.891              | .386                        |       |
|                 | Last Sex           | 1.109 <sup>h</sup>                   | 4       | .277        | .784      | .535    | .003                | 3.137              | .253                        |       |
|                 | Sex Partners       | 139.035 <sup>i</sup>                 | 4       | 34.759      | 1.947     | .101    | .008                | 7.789              | .589                        |       |
|                 | Pregnancies        | 50.859 <sup>j</sup>                  | 4       | 12.715      | 2.491     | .042    | .010                | 9.983              | .712                        |       |
|                 | BirthC             | .979 <sup>k</sup>                    | 4       | .245        | 1.113     | .349    | .004                | 4.453              | .353                        |       |
|                 | Pills              | 1.323 <sup>l</sup>                   | 4       | .331        | 1.443     | .218    | .006                | 5.773              | .452                        |       |
|                 | Inject             | 3.834 <sup>m</sup>                   | 4       | .959        | 4.038     | .003    | .016                | 16.151             | .913                        |       |
|                 | Condom             | .076 <sup>n</sup>                    | 4       | .020        | .498      | .737    | .002                | 1.992              | .170                        |       |
|                 | Implants           | .909 <sup>o</sup>                    | 4       | .227        | 2.164     | .071    | .009                | 8.655              | .642                        |       |
|                 | Loop               | .345 <sup>p</sup>                    | 4       | .086        | 1.401     | .232    | .006                | 5.603              | .439                        |       |
|                 | Natural            | .041 <sup>q</sup>                    | 4       | .010        | .874      | .479    | .003                | 3.497              | .280                        |       |
|                 | STI                | 1.652 <sup>r</sup>                   | 4       | .423        | 2.489     | .042    | .010                | 9.958              | .712                        |       |
|                 | Intercept          | Ureaplasma spp.                      | 233.363 | 1           | 233.363   | 934.826 | .000                | .484               | 934.826                     | 1.000 |
|                 |                    | M. hominis                           | 99.389  | 1           | 99.389    | 440.991 | .000                | .307               | 440.991                     | 1.000 |
| M. genitalium   |                    | .343                                 | 1       | .343        | 16.670    | .000    | .016                | 16.670             | .983                        |       |
| L. lieri        |                    | 462.929                              | 1       | 462.929     | 2467.314  | .000    | .712                | 2467.314           | 1.000                       |       |
| HPV             |                    | 201.360                              | 1       | 201.360     | 823.931   | .000    | .452                | 823.931            | 1.000                       |       |
| HSV             |                    | 26.382                               | 1       | 26.382      | 180.247   | .000    | .153                | 180.247            | 1.000                       |       |
| Age             |                    | 1251308.347                          | 1       | 1251308.347 | 13420.507 | .000    | .931                | 13420.507          | 1.000                       |       |
| Last Sex        |                    | 52.767                               | 1       | 52.767      | 149.246   | .000    | .130                | 149.246            | 1.000                       |       |
| Sex Partners    |                    | 10091.962                            | 1       | 10091.962   | 655.376   | .000    | .362                | 655.376            | 1.000                       |       |
| Pregnancies     |                    | 9836.266                             | 1       | 9836.266    | 1926.934  | .000    | .659                | 1926.934           | 1.000                       |       |
| BirthC          |                    | 394.785                              | 1       | 394.785     | 1794.763  | .000    | .643                | 1794.763           | 1.000                       |       |
| Pills           |                    | 109.767                              | 1       | 109.767     | 478.975   | .000    | .325                | 478.975            | 1.000                       |       |
| Inject          |                    | 149.956                              | 1       | 149.956     | 627.453   | .000    | .386                | 627.453            | 1.000                       |       |
| Condom          |                    | 1.459                                | 1       | 1.459       | 37.076    | .000    | .036                | 37.076             | 1.000                       |       |
| Implants        |                    | 10.231                               | 1       | 10.231      | 97.409    | .000    | .089                | 97.409             | 1.000                       |       |
| Loop            |                    | 4.408                                | 1       | 4.408       | 71.687    | .000    | .067                | 71.687             | 1.000                       |       |
| Natural         |                    | .103                                 | 1       | .103        | 8.683     | .003    | .009                | 8.683              | .837                        |       |
| STI             |                    | 117.365                              | 1       | 117.365     | 104.705   | .000    | .065                | 104.705            | 1.000                       |       |
| Cytology        |                    | Ureaplasma spp.                      | 1.391   | 4           | .348      | 1.393   | .234                | .006               | 5.573                       | .437  |
|                 |                    | M. hominis                           | .251    | 4           | .063      | .279    | .892                | .001               | 1.116                       | .112  |
|                 | M. genitalium      | .052                                 | 4       | .013        | .628      | .643    | .003                | 2.511              | .207                        |       |
|                 | L. lieri           | 1.063                                | 4       | .266        | 1.416     | .226    | .006                | 5.665              | .444                        |       |
|                 | HPV                | 5.369                                | 4       | 1.347       | 5.510     | .000    | .022                | 22.042             | .977                        |       |
|                 | HSV                | .452                                 | 4       | .113        | .772      | .543    | .003                | 3.090              | .250                        |       |
|                 | Age                | 456.037                              | 4       | 114.009     | 1.223     | .299    | .005                | 4.891              | .386                        |       |
|                 | Last Sex           | 1.109                                | 4       | .277        | .784      | .535    | .003                | 3.137              | .253                        |       |
|                 | Sex Partners       | 139.035                              | 4       | 34.759      | 1.947     | .101    | .008                | 7.789              | .589                        |       |
|                 | Pregnancies        | 50.859                               | 4       | 12.715      | 2.491     | .042    | .010                | 9.983              | .712                        |       |
|                 | BirthC             | .979                                 | 4       | .245        | 1.113     | .349    | .004                | 4.453              | .353                        |       |
|                 | Pills              | 1.323                                | 4       | .331        | 1.443     | .218    | .006                | 5.773              | .452                        |       |
|                 | Inject             | 3.834                                | 4       | .959        | 4.038     | .003    | .016                | 16.151             | .913                        |       |
|                 | Condom             | .076                                 | 4       | .020        | .498      | .737    | .002                | 1.992              | .170                        |       |
|                 | Implants           | .909                                 | 4       | .227        | 2.164     | .071    | .009                | 8.655              | .642                        |       |
|                 | Loop               | .345                                 | 4       | .086        | 1.401     | .232    | .006                | 5.603              | .439                        |       |
|                 | Natural            | .041                                 | 4       | .010        | .874      | .479    | .003                | 3.497              | .280                        |       |
|                 | STI                | 1.652                                | 4       | .423        | 2.489     | .042    | .010                | 9.958              | .712                        |       |
|                 | Error              | Ureaplasma spp.                      | 248.684 | 997         | .250      |         |                     |                    |                             |       |
|                 |                    | M. hominis                           | 224.700 | 997         | .225      |         |                     |                    |                             |       |
| M. genitalium   |                    | 20.508                               | 997     | .021        |           |         |                     |                    |                             |       |
| L. lieri        |                    | 187.062                              | 997     | .188        |           |         |                     |                    |                             |       |
| HPV             |                    | 242.145                              | 997     | .243        |           |         |                     |                    |                             |       |
| HSV             |                    | 145.927                              | 997     | .146        |           |         |                     |                    |                             |       |
| Age             |                    | 92958.813                            | 997     | 93.239      |           |         |                     |                    |                             |       |
| Last Sex        |                    | 352.496                              | 997     | .354        |           |         |                     |                    |                             |       |
| Sex Partners    |                    | 17360.459                            | 997     | 17.360      |           |         |                     |                    |                             |       |
| Pregnancies     |                    | 5089.308                             | 997     | 5.105       |           |         |                     |                    |                             |       |
| BirthC          |                    | 219.305                              | 997     | .220        |           |         |                     |                    |                             |       |
| Pills           |                    | 228.482                              | 997     | .229        |           |         |                     |                    |                             |       |
| Inject          |                    | 236.686                              | 997     | .237        |           |         |                     |                    |                             |       |
| Condom          |                    | 39.244                               | 997     | .039        |           |         |                     |                    |                             |       |
| Implants        |                    | 104.720                              | 997     | .105        |           |         |                     |                    |                             |       |
| Loop            |                    | 61.308                               | 997     | .061        |           |         |                     |                    |                             |       |
| Natural         |                    | 11.815                               | 997     | .012        |           |         |                     |                    |                             |       |
| STI             |                    | 169.441                              | 997     | .170        |           |         |                     |                    |                             |       |
| Total           |                    | Ureaplasma spp.                      | 516.000 | 1002        |           |         |                     |                    |                             |       |
|                 |                    | M. hominis                           | 341.000 | 1002        |           |         |                     |                    |                             |       |
|                 | M. genitalium      | 21.000                               | 1002    |             |           |         |                     |                    |                             |       |
|                 | L. lieri           | 751.000                              | 1002    |             |           |         |                     |                    |                             |       |
|                 | HPV                | 444.000                              | 1002    |             |           |         |                     |                    |                             |       |
|                 | HSV                | 178.000                              | 1002    |             |           |         |                     |                    |                             |       |
|                 | Age                | 1564112.000                          | 1002    |             |           |         |                     |                    |                             |       |
|                 | Last Sex           | 414.000                              | 1002    |             |           |         |                     |                    |                             |       |
|                 | Sex Partners       | 29293.000                            | 1002    |             |           |         |                     |                    |                             |       |
|                 | Pregnancies        | 16187.000                            | 1002    |             |           |         |                     |                    |                             |       |
|                 | BirthC             | 675.000                              | 1002    |             |           |         |                     |                    |                             |       |
|                 | Pills              | 357.000                              | 1002    |             |           |         |                     |                    |                             |       |
|                 | Inject             | 401.000                              | 1002    |             |           |         |                     |                    |                             |       |
|                 | Condom             | 41.000                               | 1002    |             |           |         |                     |                    |                             |       |
|                 | Implants           | 120.000                              | 1002    |             |           |         |                     |                    |                             |       |
|                 | Loop               | 66.000                               | 1002    |             |           |         |                     |                    |                             |       |
|                 | Natural            | 12.000                               | 1002    |             |           |         |                     |                    |                             |       |
|                 | STI                | 188.000                              | 1002    |             |           |         |                     |                    |                             |       |
|                 | Corrected Total    | Ureaplasma spp.                      | 250.275 | 1001        |           |         |                     |                    |                             |       |
|                 |                    | M. hominis                           | 224.951 | 1001        |           |         |                     |                    |                             |       |
| M. genitalium   |                    | 20.560                               | 1001    |             |           |         |                     |                    |                             |       |
| L. lieri        |                    | 188.125                              | 1001    |             |           |         |                     |                    |                             |       |
| HPV             |                    | 249.134                              | 1001    |             |           |         |                     |                    |                             |       |
| HSV             |                    | 146.379                              | 1001    |             |           |         |                     |                    |                             |       |
| Age             |                    | 93414.850                            | 1001    |             |           |         |                     |                    |                             |       |
| Last Sex        |                    | 353.605                              | 1001    |             |           |         |                     |                    |                             |       |
| Sex Partners    |                    | 17935.494                            | 1001    |             |           |         |                     |                    |                             |       |
| Pregnancies     |                    | 5140.165                             | 1001    |             |           |         |                     |                    |                             |       |
| BirthC          |                    | 220.284                              | 1001    |             |           |         |                     |                    |                             |       |
| Pills           |                    | 229.805                              | 1001    |             |           |         |                     |                    |                             |       |
| Inject          |                    | 240.520                              | 1001    |             |           |         |                     |                    |                             |       |
| Condom          |                    | 39.222                               | 1001    |             |           |         |                     |                    |                             |       |
| Implants        |                    | 105.629                              | 1001    |             |           |         |                     |                    |                             |       |
| Loop            |                    | 61.653                               | 1001    |             |           |         |                     |                    |                             |       |
| Natural         |                    | 11.856                               | 1001    |             |           |         |                     |                    |                             |       |
| STI             |                    | 171.134                              | 1001    |             |           |         |                     |                    |                             |       |

<sup>a</sup>. R Squared = .005 (Adjusted R Squared = .002)  
<sup>b</sup>. R Squared = .001 (Adjusted R Squared = -.003)  
<sup>c</sup>. R Squared = .003 (Adjusted R Squared = -.001)  
<sup>d</sup>. R Squared = .006 (Adjusted R Squared = .002)  
<sup>e</sup>. R Squared = .022 (Adjusted R Squared = .018)  
<sup>f</sup>. R Squared = .003 (Adjusted R Squared = -.001)  
<sup>g</sup>. R Squared = .005 (Adjusted R Squared = .001)  
<sup>h</sup>. R Squared = .003 (Adjusted R Squared = -.001)  
<sup>i</sup>. R Squared = .008 (Adjusted R Squared = .004)  
<sup>j</sup>. R Squared = .016 (Adjusted R Squared = .006)  
<sup>k</sup>. R Squared = .004 (Adjusted R Squared = .000)  
<sup>l</sup>. R Squared = .006 (Adjusted R Squared = .002)  
<sup>m</sup>. R Squared = .016 (Adjusted R Squared = .012)  
<sup>n</sup>. R Squared = .002 (Adjusted R Squared = -.002)  
<sup>o</sup>. R Squared = .006 (Adjusted R Squared = .005)  
<sup>p</sup>. R Squared = .006 (Adjusted R Squared = .002)  
<sup>q</sup>. R Squared = .003 (Adjusted R Squared = -.001)  
<sup>r</sup>. R Squared = .010 (Adjusted R Squared = .006)  
<sup>s</sup>. Computed using alpha = .05

B

**Tests of Between-Subjects Effects**

| Source          | Dependent Variable | Type III Sum of Squares | df          | Mean Square | F        | Sig. | Partial Eta Squared | Nonscent Parameter | Observed Power <sup>a</sup> |
|-----------------|--------------------|-------------------------|-------------|-------------|----------|------|---------------------|--------------------|-----------------------------|
| Corrected Model | Cytology           | 2.639 <sup>a</sup>      | 1           | 2.639       | 1.775    | .183 | .002                | 1.775              | .265                        |
|                 | M. hominis         | 2.004 <sup>b</sup>      | 1           | 2.004       | 8.989    | .003 | .009                | 8.989              | .850                        |
|                 | M. genitalium      | .041 <sup>c</sup>       | 1           | .041        | 1.976    | .160 | .002                | 1.976              | .290                        |
|                 | L. iners           | 3.190 <sup>d</sup>      | 1           | 3.190       | 17.252   | .000 | .017                | 17.252             | .986                        |
|                 | HPV                | .322 <sup>e</sup>       | 1           | .322        | 1.316    | .252 | .001                | 1.316              | .299                        |
|                 | Age                | 1.066 <sup>f</sup>      | 1           | 1.066       | 7.337    | .007 | .007                | 7.337              | .772                        |
|                 | Sex Partners       | .147 <sup>g</sup>       | 1           | .147        | .008     | .928 | .000                | .008               | .051                        |
|                 | Pregnancies        | .077 <sup>h</sup>       | 1           | .077        | .351     | .554 | .000                | .351               | .091                        |
|                 | Inject             | .528 <sup>i</sup>       | 1           | .528        | 2.201    | .138 | .002                | 2.201              | .317                        |
|                 | Condom             | .068 <sup>j</sup>       | 1           | .068        | 1.723    | .190 | .002                | 1.723              | .259                        |
|                 | Implants           | .207 <sup>k</sup>       | 1           | .207        | 1.967    | .161 | .002                | 1.967              | .289                        |
|                 | Loop               | .064 <sup>l</sup>       | 1           | .064        | 1.032    | .310 | .001                | 1.032              | .174                        |
|                 | Natural            | .006 <sup>m</sup>       | 1           | .006        | .469     | .494 | .000                | .469               | .105                        |
|                 | STI                | .062 <sup>n</sup>       | 1           | .062        | .364     | .547 | .000                | .364               | .093                        |
|                 | Intercept          | 2842.655                | 1           | 2842.655    | 1911.721 | .000 | .657                | 1911.721           | 1.000                       |
|                 | M. hominis         | 115.034                 | 1           | 115.034     | 515.969  | .000 | .340                | 515.969            | 1.000                       |
|                 | M. genitalium      | .432                    | 1           | .432        | 21.042   | .000 | .021                | 21.042             | .996                        |
|                 | L. iners           | 559.937                 | 1           | 559.937     | 3027.221 | .000 | .752                | 3027.221           | 1.000                       |
|                 | HPV                | 214.172                 | 1           | 214.172     | 860.798  | .000 | .463                | 860.798            | 1.000                       |
|                 | Age                | 31.246                  | 1           | 31.246      | 215.024  | .000 | .177                | 215.024            | 1.000                       |
| Sex Partners    | 1469826.967        | 1                       | 1469826.967 | 15740.826   | .000     | .940 | 15740.826           | 1.000              |                             |
| Pregnancies     | 60.833             | 1                       | 60.833      | 172.578     | .000     | .147 | 172.578             | 1.000              |                             |
| Inject          | 11314.909          | 1                       | 11314.909   | 630.872     | .000     | .387 | 630.872             | 1.000              |                             |
| Condom          | 11034.668          | 1                       | 11034.668   | 2146.808    | .000     | .682 | 2146.808            | 1.000              |                             |
| Implants        | 453.853            | 1                       | 453.853     | 2081.493    | .000     | .673 | 2081.493            | 1.000              |                             |
| Loop            | 127.117            | 1                       | 127.117     | 553.156     | .000     | .356 | 553.156             | 1.000              |                             |
| Natural         | 159.788            | 1                       | 159.788     | 685.798     | .000     | .400 | 685.798             | 1.000              |                             |
| STI             | 1.856              | 1                       | 1.856       | 43.214      | .000     | .241 | 43.214              | 1.000              |                             |
| Ureaplasmappp   | 14.255             | 1                       | 14.255      | 135.222     | .000     | .119 | 135.222             | 1.000              |                             |
| Loop            | 4.375              | 1                       | 4.375       | 71.034      | .000     | .066 | 71.034              | 1.000              |                             |
| Natural         | .145               | 1                       | .145        | 12.259      | .000     | .012 | 12.259              | .938               |                             |
| STI             | 16.913             | 1                       | 16.913      | 98.862      | .000     | .090 | 98.862              | 1.000              |                             |
| Cytology        | 2.639              | 1                       | 2.639       | 1.775       | .183     | .002 | 1.775               | .265               |                             |
| M. hominis      | 2.004              | 1                       | 2.004       | 8.989       | .003     | .009 | 8.989               | .850               |                             |
| M. genitalium   | .041               | 1                       | .041        | 1.976       | .160     | .002 | 1.976               | .290               |                             |
| L. iners        | 3.190              | 1                       | 3.190       | 17.252      | .000     | .017 | 17.252              | .986               |                             |
| HPV             | .322               | 1                       | .322        | 1.316       | .252     | .001 | 1.316               | .299               |                             |
| Age             | 1.066              | 1                       | 1.066       | 7.337       | .007     | .007 | 7.337               | .772               |                             |
| Sex Partners    | .147               | 1                       | .147        | .008        | .928     | .000 | .008                | .051               |                             |
| Pregnancies     | .077               | 1                       | .077        | .351        | .554     | .000 | .351                | .091               |                             |
| Inject          | .528               | 1                       | .528        | 2.201       | .138     | .002 | 2.201               | .317               |                             |
| Condom          | .068               | 1                       | .068        | 1.723       | .190     | .002 | 1.723               | .259               |                             |
| Implants        | .207               | 1                       | .207        | 1.967       | .161     | .002 | 1.967               | .289               |                             |
| Loop            | .064               | 1                       | .064        | 1.032       | .310     | .001 | 1.032               | .174               |                             |
| Natural         | .006               | 1                       | .006        | .469        | .494     | .000 | .469                | .105               |                             |
| STI             | .062               | 1                       | .062        | .364        | .547     | .000 | .364                | .093               |                             |
| Error           | Cytology           | 1466.862                | 1000        | 1.467       |          |      |                     |                    |                             |
| M. hominis      | 222.947            | 1000                    | .223        |             |          |      |                     |                    |                             |
| M. genitalium   | 20.519             | 1000                    | .021        |             |          |      |                     |                    |                             |
| L. iners        | 184.924            | 1000                    | .185        |             |          |      |                     |                    |                             |
| HPV             | 240.866            | 1000                    | .241        |             |          |      |                     |                    |                             |
| Age             | 145.313            | 1000                    | .145        |             |          |      |                     |                    |                             |
| Sex Partners    | 93376.734          | 1000                    | 93.377      |             |          |      |                     |                    |                             |
| Pregnancies     | 352.493            | 1000                    | .352        |             |          |      |                     |                    |                             |
| Inject          | 17935.247          | 1000                    | 17.935      |             |          |      |                     |                    |                             |
| Condom          | 5140.235           | 1000                    | 5.140       |             |          |      |                     |                    |                             |
| Implants        | 220.207            | 1000                    | .220        |             |          |      |                     |                    |                             |
| Loop            | 229.803            | 1000                    | .230        |             |          |      |                     |                    |                             |
| Natural         | 239.992            | 1000                    | .240        |             |          |      |                     |                    |                             |
| STI             | 29.255             | 1000                    | .029        |             |          |      |                     |                    |                             |
| Total           | Cytology           | 4340.000                | 1002        |             |          |      |                     |                    |                             |
| M. hominis      | 341.000            | 1002                    |             |             |          |      |                     |                    |                             |
| M. genitalium   | 21.000             | 1002                    |             |             |          |      |                     |                    |                             |
| L. iners        | 751.000            | 1002                    |             |             |          |      |                     |                    |                             |
| HPV             | 464.000            | 1002                    |             |             |          |      |                     |                    |                             |
| Age             | 1564412.000        | 1002                    |             |             |          |      |                     |                    |                             |
| Sex Partners    | 414.000            | 1002                    |             |             |          |      |                     |                    |                             |
| Pregnancies     | 29263.000          | 1002                    |             |             |          |      |                     |                    |                             |
| Inject          | 16167.000          | 1002                    |             |             |          |      |                     |                    |                             |
| Condom          | 675.000            | 1002                    |             |             |          |      |                     |                    |                             |
| Implants        | 357.000            | 1002                    |             |             |          |      |                     |                    |                             |
| Loop            | 401.000            | 1002                    |             |             |          |      |                     |                    |                             |
| Natural         | 41.000             | 1002                    |             |             |          |      |                     |                    |                             |
| STI             | 120.000            | 1002                    |             |             |          |      |                     |                    |                             |
| Corrected Total | Cytology           | 12.000                  | 1002        |             |          |      |                     |                    |                             |
| M. hominis      | 188.000            | 1002                    |             |             |          |      |                     |                    |                             |
| M. genitalium   | 1489.601           | 1001                    |             |             |          |      |                     |                    |                             |
| L. iners        | 224.951            | 1001                    |             |             |          |      |                     |                    |                             |
| M. genitalium   | 20.560             | 1001                    |             |             |          |      |                     |                    |                             |
| L. iners        | 188.125            | 1001                    |             |             |          |      |                     |                    |                             |
| HPV             | 249.134            | 1001                    |             |             |          |      |                     |                    |                             |
| Age             | 1462.979           | 1001                    |             |             |          |      |                     |                    |                             |
| Sex Partners    | 93414.850          | 1001                    |             |             |          |      |                     |                    |                             |
| Pregnancies     | 353.605            | 1001                    |             |             |          |      |                     |                    |                             |
| Inject          | 17935.484          | 1001                    |             |             |          |      |                     |                    |                             |
| Condom          | 5140.165           | 1001                    |             |             |          |      |                     |                    |                             |
| Implants        | 220.284            | 1001                    |             |             |          |      |                     |                    |                             |
| Loop            | 229.805            | 1001                    |             |             |          |      |                     |                    |                             |
| Natural         | 240.520            | 1001                    |             |             |          |      |                     |                    |                             |
| STI             | 29.222             | 1001                    |             |             |          |      |                     |                    |                             |
| Corrected Total | Cytology           | 11.856                  | 1001        |             |          |      |                     |                    |                             |
| M. hominis      | 188.000            | 1002                    |             |             |          |      |                     |                    |                             |
| M. genitalium   | 1489.601           | 1001                    |             |             |          |      |                     |                    |                             |
| L. iners        | 224.951            | 1001                    |             |             |          |      |                     |                    |                             |
| M. genitalium   | 20.560             | 1001                    |             |             |          |      |                     |                    |                             |
| L. iners        | 188.125            | 1001                    |             |             |          |      |                     |                    |                             |
| HPV             | 249.134            | 1001                    |             |             |          |      |                     |                    |                             |
| Age             | 1462.979           | 1001                    |             |             |          |      |                     |                    |                             |
| Sex Partners    | 93414.850          | 1001                    |             |             |          |      |                     |                    |                             |
| Pregnancies     | 353.605            | 1001                    |             |             |          |      |                     |                    |                             |
| Inject          | 17935.484          | 1001                    |             |             |          |      |                     |                    |                             |
| Condom          | 5140.165           | 1001                    |             |             |          |      |                     |                    |                             |
| Implants        | 220.284            | 1001                    |             |             |          |      |                     |                    |                             |
| Loop            | 229.805            | 1001                    |             |             |          |      |                     |                    |                             |
| Natural         | 240.520            | 1001                    |             |             |          |      |                     |                    |                             |
| STI             | 29.222             | 1001                    |             |             |          |      |                     |                    |                             |

a. R Squared = .002 (Adjusted R Squared = .001)  
 b. R Squared = .009 (Adjusted R Squared = .008)  
 c. R Squared = .002 (Adjusted R Squared = .001)  
 d. R Squared = .017 (Adjusted R Squared = .016)  
 e. R Squared = .001 (Adjusted R Squared = .000)  
 f. R Squared = .007 (Adjusted R Squared = .006)  
 g. R Squared = .000 (Adjusted R Squared = -.001)  
 h. R Squared = .003 (Adjusted R Squared = .002)  
 i. R Squared = .000 (Adjusted R Squared = -.001)  
 j. R Squared = .000 (Adjusted R Squared = -.001)  
 k. R Squared = .000 (Adjusted R Squared = -.001)  
 l. R Squared = .000 (Adjusted R Squared = -.001)  
 m. R Squared = .002 (Adjusted R Squared = .001)  
 n. R Squared = .002 (Adjusted R Squared = .001)  
 o. R Squared = .002 (Adjusted R Squared = .001)  
 p. R Squared = .001 (Adjusted R Squared = .000)  
 q. R Squared = .000 (Adjusted R Squared = -.001)  
 r. R Squared = .000 (Adjusted R Squared = -.001)  
 s. Computed using alpha = .05

C

| Tests of Between-Subjects Effects |                    |                         |          |             |           |          |                     |                    |                             |       |
|-----------------------------------|--------------------|-------------------------|----------|-------------|-----------|----------|---------------------|--------------------|-----------------------------|-------|
| Source                            | Dependent Variable | Type III Sum of Squares | df       | Mean Square | F         | Sig.     | Partial Eta Squared | Noncent. Parameter | Observed Power <sup>a</sup> |       |
| Corrected Model                   | Cytology           | .036 <sup>a</sup>       | 1        | .036        | .024      | .876     | .000                | .024               | .053                        |       |
|                                   | Ureaplasma spp.    | 2.230 <sup>b</sup>      | 1        | 2.230       | 9.889     | .003     | .009                | 9.889              | .850                        |       |
|                                   | M. genitalium      | .105 <sup>c</sup>       | 1        | .105        | 5.119     | .024     | .005                | 5.119              | .618                        |       |
|                                   | L. iners           | 3.948 <sup>d</sup>      | 1        | 3.948       | 20.980    | .000     | .020                | 20.980             | .995                        |       |
|                                   | HPV                | 6.450 <sup>e</sup>      | 1        | 6.450       | 26.579    | .000     | .026                | 26.579             | .999                        |       |
|                                   | HSV                | 13.167 <sup>f</sup>     | 1        | 13.167      | 98.840    | .000     | .090                | 98.840             | 1.000                       |       |
|                                   | Age                | 165.895 <sup>g</sup>    | 1        | 165.895     | 1.779     | .183     | .002                | 1.779              | .266                        |       |
|                                   | Last Sex           | 1.396 <sup>h</sup>      | 1        | 1.396       | 3.962     | .047     | .004                | 3.962              | .511                        |       |
|                                   | Sex Partners       | 99.308 <sup>i</sup>     | 1        | 99.308      | 5.568     | .018     | .008                | 5.568              | .654                        |       |
|                                   | Pregnancies        | 5.212 <sup>j</sup>      | 1        | 5.212       | 1.015     | .314     | .001                | 1.015              | .172                        |       |
|                                   | BirHC              | .602 <sup>k</sup>       | 1        | .602        | 0.10      | .919     | .000                | 0.10               | .051                        |       |
|                                   | Pills              | .028 <sup>l</sup>       | 1        | .028        | .121      | .727     | .000                | .121               | .064                        |       |
|                                   | Inject             | .136 <sup>m</sup>       | 1        | .136        | .566      | .452     | .001                | .566               | .117                        |       |
|                                   | Condom             | .019 <sup>n</sup>       | 1        | .019        | .474      | .491     | .000                | .474               | .106                        |       |
|                                   | Implants           | .021 <sup>o</sup>       | 1        | .021        | .197      | .657     | .000                | .197               | .073                        |       |
|                                   | Loop               | .133 <sup>p</sup>       | 1        | .133        | 2.155     | .142     | .002                | 2.155              | .311                        |       |
|                                   | Natural            | 3.124E-5 <sup>q</sup>   | 1        | 3.124E-5    | .003      | .959     | .000                | .003               | .050                        |       |
|                                   | STI                | .841 <sup>r</sup>       | 1        | .841        | 4.941     | .026     | .005                | 4.941              | .603                        |       |
|                                   | Intercept          | Cytology                | 2565.849 | 1           | 2565.849  | 1722.450 | .000                | .633               | 1722.450                    | 1.000 |
|                                   |                    | Ureaplasma spp.         | 253.583  | 1           | 253.583   | 1022.322 | .000                | .506               | 1022.322                    | 1.000 |
|                                   |                    | M. genitalium           | .236     | 1           | .236      | 25.195   | .000                | .026               | 25.195                      | .999  |
| L. iners                          |                    | 534.027                 | 1        | 534.027     | 2897.959  | .000     | .743                | 2897.959           | 1.000                       |       |
| HPV                               |                    | 216.143                 | 1        | 216.143     | 890.637   | .000     | .471                | 890.637            | 1.000                       |       |
| HSV                               |                    | 42.089                  | 1        | 42.089      | 315.953   | .000     | .240                | 315.953            | 1.000                       |       |
| Age                               |                    | 1311260.933             | 1        | 1311260.933 | 14081.937 | .000     | .934                | 14081.937          | 1.000                       |       |
| Last Sex                          |                    | 48.021                  | 1        | 48.021      | 138.613   | .000     | .122                | 138.613            | 1.000                       |       |
| Sex Partners                      |                    | 10024.290               | 1        | 10024.290   | 606.972   | .000     | .378                | 606.972            | 1.000                       |       |
| Pregnancies                       |                    | 9775.440                | 1        | 9775.440    | 1903.706  | .000     | .656                | 1903.706           | 1.000                       |       |
| BirHC                             |                    | 487.723                 | 1        | 487.723     | 1850.912  | .000     | .649                | 1850.912           | 1.000                       |       |
| Pills                             |                    | 115.365                 | 1        | 115.365     | 902.074   | .000     | .334                | 902.074            | 1.000                       |       |
| Inject                            |                    | 146.954                 | 1        | 146.954     | 611.332   | .000     | .379                | 611.332            | 1.000                       |       |
| Condom                            |                    | 1.815                   | 1        | 1.815       | 41.101    | .000     | .000                | 41.101             | 1.000                       |       |
| Implants                          |                    | 13.238                  | 1        | 13.238      | 125.354   | .000     | .111                | 125.354            | 1.000                       |       |
| Loop                              |                    | 3.458                   | 1        | 3.458       | 56.208    | .000     | .053                | 56.208             | 1.000                       |       |
| Natural                           |                    | .128                    | 1        | .128        | 10.777    | .001     | .011                | 10.777             | .307                        |       |
| STI                               |                    | 17.512                  | 1        | 17.512      | 102.036   | .000     | .093                | 102.036            | 1.000                       |       |
| M:homins                          |                    | Cytology                | .036     | 1           | .036      | .024     | .876                | .000               | .024                        | .053  |
|                                   |                    | Ureaplasma spp.         | 2.230    | 1           | 2.230     | 9.889    | .003                | .009               | 9.889                       | .850  |
|                                   |                    | M. genitalium           | .105     | 1           | .105      | 5.119    | .024                | .005               | 5.119                       | .618  |
|                                   | L. iners           | 3.948                   | 1        | 3.948       | 20.980    | .000     | .020                | 20.980             | .995                        |       |
|                                   | HPV                | 6.450                   | 1        | 6.450       | 26.579    | .000     | .026                | 26.579             | .999                        |       |
|                                   | HSV                | 13.167                  | 1        | 13.167      | 98.840    | .000     | .090                | 98.840             | 1.000                       |       |
|                                   | Age                | 165.895                 | 1        | 165.895     | 1.779     | .183     | .002                | 1.779              | .266                        |       |
|                                   | Last Sex           | 1.396                   | 1        | 1.396       | 3.962     | .047     | .004                | 3.962              | .511                        |       |
|                                   | Sex Partners       | 99.308                  | 1        | 99.308      | 5.568     | .018     | .008                | 5.568              | .654                        |       |
|                                   | Pregnancies        | 5.212                   | 1        | 5.212       | 1.015     | .314     | .001                | 1.015              | .172                        |       |
|                                   | BirHC              | .602                    | 1        | .602        | 0.10      | .919     | .000                | 0.10               | .051                        |       |
|                                   | Pills              | .028                    | 1        | .028        | .121      | .727     | .000                | .121               | .064                        |       |
|                                   | Inject             | .136                    | 1        | .136        | .566      | .452     | .001                | .566               | .117                        |       |
|                                   | Condom             | .019                    | 1        | .019        | .474      | .491     | .000                | .474               | .106                        |       |
|                                   | Implants           | .021                    | 1        | .021        | .197      | .657     | .000                | .197               | .073                        |       |
|                                   | Loop               | .133                    | 1        | .133        | 2.155     | .142     | .002                | 2.155              | .311                        |       |
|                                   | Natural            | 3.124E-5                | 1        | 3.124E-5    | .003      | .959     | .000                | .003               | .050                        |       |
|                                   | STI                | .841                    | 1        | .841        | 4.941     | .026     | .005                | 4.941              | .603                        |       |
|                                   | Error              | Cytology                | 1489.664 | 1000        | 1.490     |          |                     |                    |                             |       |
|                                   |                    | Ureaplasma spp.         | 248.046  | 1000        | .248      |          |                     |                    |                             |       |
|                                   |                    | M. genitalium           | 20.455   | 1000        | .020      |          |                     |                    |                             |       |
| L. iners                          |                    | 184.277                 | 1000     | .184        |           |          |                     |                    |                             |       |
| HPV                               |                    | 242.684                 | 1000     | .243        |           |          |                     |                    |                             |       |
| HSV                               |                    | 133.212                 | 1000     | .133        |           |          |                     |                    |                             |       |
| Age                               |                    | 93248.955               | 1000     | 93.249      |           |          |                     |                    |                             |       |
| Last Sex                          |                    | 352.209                 | 1000     | .352        |           |          |                     |                    |                             |       |
| Sex Partners                      |                    | 17836.186               | 1000     | 17.836      |           |          |                     |                    |                             |       |
| Pregnancies                       |                    | 5134.952                | 1000     | 5.135       |           |          |                     |                    |                             |       |
| BirHC                             |                    | 230.282                 | 1000     | .230        |           |          |                     |                    |                             |       |
| Pills                             |                    | 229.777                 | 1000     | .230        |           |          |                     |                    |                             |       |
| Inject                            |                    | 240.394                 | 1000     | .240        |           |          |                     |                    |                             |       |
| Condom                            |                    | 39.304                  | 1000     | .039        |           |          |                     |                    |                             |       |
| Implants                          |                    | 185.608                 | 1000     | .186        |           |          |                     |                    |                             |       |
| Loop                              |                    | 61.620                  | 1000     | .062        |           |          |                     |                    |                             |       |
| Natural                           |                    | 11.856                  | 1000     | .012        |           |          |                     |                    |                             |       |
| STI                               |                    | 170.292                 | 1000     | .170        |           |          |                     |                    |                             |       |
| Total                             |                    | Cytology                | 4340.000 | 1002        |           |          |                     |                    |                             |       |
|                                   |                    | Ureaplasma spp.         | 516.000  | 1002        |           |          |                     |                    |                             |       |
|                                   |                    | M. genitalium           | 21.000   | 1002        |           |          |                     |                    |                             |       |
|                                   | L. iners           | 751.000                 | 1002     |             |           |          |                     |                    |                             |       |
|                                   | HPV                | 464.000                 | 1002     |             |           |          |                     |                    |                             |       |
|                                   | HSV                | 178.000                 | 1002     |             |           |          |                     |                    |                             |       |
|                                   | Age                | 1564112.000             | 1002     |             |           |          |                     |                    |                             |       |
|                                   | Last Sex           | 414.000                 | 1002     |             |           |          |                     |                    |                             |       |
|                                   | Sex Partners       | 29263.000               | 1002     |             |           |          |                     |                    |                             |       |
|                                   | Pregnancies        | 16187.000               | 1002     |             |           |          |                     |                    |                             |       |
|                                   | BirHC              | 675.000                 | 1002     |             |           |          |                     |                    |                             |       |
|                                   | Pills              | 397.000                 | 1002     |             |           |          |                     |                    |                             |       |
|                                   | Inject             | 491.000                 | 1002     |             |           |          |                     |                    |                             |       |
|                                   | Condom             | 41.000                  | 1002     |             |           |          |                     |                    |                             |       |
|                                   | Implants           | 120.000                 | 1002     |             |           |          |                     |                    |                             |       |
|                                   | Loop               | 66.000                  | 1002     |             |           |          |                     |                    |                             |       |
|                                   | Natural            | 12.000                  | 1002     |             |           |          |                     |                    |                             |       |
|                                   | STI                | 188.000                 | 1002     |             |           |          |                     |                    |                             |       |
|                                   | Corrected Total    | Cytology                | 1489.601 | 1001        |           |          |                     |                    |                             |       |
|                                   |                    | Ureaplasma spp.         | 250.275  | 1001        |           |          |                     |                    |                             |       |
|                                   |                    | M. genitalium           | 20.560   | 1001        |           |          |                     |                    |                             |       |
| L. iners                          |                    | 188.125                 | 1001     |             |           |          |                     |                    |                             |       |
| HPV                               |                    | 249.134                 | 1001     |             |           |          |                     |                    |                             |       |
| HSV                               |                    | 146.379                 | 1001     |             |           |          |                     |                    |                             |       |
| Age                               |                    | 93414.850               | 1001     |             |           |          |                     |                    |                             |       |
| Last Sex                          |                    | 353.605                 | 1001     |             |           |          |                     |                    |                             |       |
| Sex Partners                      |                    | 17935.494               | 1001     |             |           |          |                     |                    |                             |       |
| Pregnancies                       |                    | 5140.165                | 1001     |             |           |          |                     |                    |                             |       |
| BirHC                             |                    | 230.284                 | 1001     |             |           |          |                     |                    |                             |       |
| Pills                             |                    | 229.805                 | 1001     |             |           |          |                     |                    |                             |       |
| Inject                            |                    | 240.620                 | 1001     |             |           |          |                     |                    |                             |       |
| Condom                            |                    | 39.322                  | 1001     |             |           |          |                     |                    |                             |       |
| Implants                          |                    | 185.629                 | 1001     |             |           |          |                     |                    |                             |       |
| Loop                              |                    | 61.653                  | 1001     |             |           |          |                     |                    |                             |       |
| Natural                           |                    | 11.856                  | 1001     |             |           |          |                     |                    |                             |       |
| STI                               |                    | 171.134                 | 1001     |             |           |          |                     |                    |                             |       |

a. R Squared = .000 (Adjusted R Squared = -.001)  
 b. R Squared = .009 (Adjusted R Squared = .008)  
 c. R Squared = .005 (Adjusted R Squared = .004)  
 d. R Squared = .020 (Adjusted R Squared = .019)  
 e. R Squared = .026 (Adjusted R Squared = .025)  
 f. R Squared = .090 (Adjusted R Squared = .089)  
 g. R Squared = .002 (Adjusted R Squared = .001)  
 h. R Squared = .004 (Adjusted R Squared = .003)  
 i. R Squared = .006 (Adjusted R Squared = .005)  
 j. R Squared = .001 (Adjusted R Squared = .000)  
 k. R Squared = .000 (Adjusted R Squared = -.001)  
 l. R Squared = .000 (Adjusted R Squared = -.001)  
 m. R Squared = .001 (Adjusted R Squared = .000)  
 n. R Squared = .000 (Adjusted R Squared = -.001)  
 o. R Squared = .000 (Adjusted R Squared = -.001)  
 p. R Squared = .002 (Adjusted R Squared = .001)  
 q. R Squared = .000 (Adjusted R Squared = -.001)  
 r. R Squared = .005 (Adjusted R Squared = .004)  
 s. Computed using alpha = .05

D

| Tests of Between-Subjects Effects |                    |                         |          |             |          |         |                     |                   |                             |       |
|-----------------------------------|--------------------|-------------------------|----------|-------------|----------|---------|---------------------|-------------------|-----------------------------|-------|
| Source                            | Dependent Variable | Type III Sum of Squares | df       | Mean Square | F        | Sig.    | Partial Eta Squared | Noncent Parameter | Observed Power <sup>a</sup> |       |
| Corrected Model                   | Cytology           | .009 <sup>a</sup>       | 1        | .009        | .006     | .940    | .000                | .006              | .051                        |       |
|                                   | Ureaplasma spp.    | .494 <sup>b</sup>       | 1        | .494        | 1.976    | .160    | .002                | 1.976             | .290                        |       |
|                                   | M. hominis         | 1.144 <sup>c</sup>      | 1        | 1.146       | 5.119    | .024    | .005                | 5.119             | .618                        |       |
|                                   | L. iners           | .077 <sup>d</sup>       | 1        | .077        | .411     | .522    | .000                | .411              | .098                        |       |
|                                   | HPV                | .026 <sup>e</sup>       | 1        | .026        | .103     | .749    | .000                | .103              | .062                        |       |
|                                   | HV                 | 1.912 <sup>f</sup>      | 1        | 1.912       | 13.233   | .000    | .013                | 13.233            | .953                        |       |
|                                   | Age                | 178.258 <sup>g</sup>    | 1        | 178.258     | 1.912    | .167    | .002                | 1.912             | .282                        |       |
|                                   | Last Sex           | .226 <sup>h</sup>       | 1        | .226        | .840     | .424    | .001                | .840              | .128                        |       |
|                                   | Sex Partners       | .007 <sup>i</sup>       | 1        | .007        | .000     | .984    | .000                | .000              | .050                        |       |
|                                   | Pregnancies        | 1.087 <sup>j</sup>      | 1        | 1.087       | .212     | .646    | .000                | .212              | .075                        |       |
|                                   | BirthC             | .064 <sup>k</sup>       | 1        | .064        | .290     | .590    | .000                | .290              | .084                        |       |
|                                   | Pills              | .300 <sup>l</sup>       | 1        | .300        | 1.306    | .253    | .001                | 1.306             | .208                        |       |
|                                   | Insect             | .124 <sup>m</sup>       | 1        | .124        | .515     | .473    | .001                | .515              | .111                        |       |
|                                   | Condom             | .063 <sup>n</sup>       | 1        | .063        | 1.612    | .204    | .002                | 1.612             | .245                        |       |
|                                   | Implants           | .013 <sup>o</sup>       | 1        | .013        | .122     | .727    | .000                | .122              | .064                        |       |
|                                   | Loop               | .019 <sup>p</sup>       | 1        | .019        | .300     | .584    | .000                | .300              | .085                        |       |
|                                   | Natural            | .003 <sup>q</sup>       | 1        | .003        | .260     | .611    | .000                | .260              | .080                        |       |
|                                   | STI                | 1.915 <sup>r</sup>      | 1        | 1.915       | 11.319   | .001    | .011                | 11.319            | .919                        |       |
|                                   | Intercept          | Cytology                | 231.246  | 1           | 231.246  | 155.241 | .000                | .134              | 155.241                     | 1.000 |
|                                   |                    | Ureaplasma spp.         | 28.549   | 1           | 28.549   | 114.298 | .000                | .103              | 114.298                     | 1.000 |
| M. hominis                        |                    | 16.906                  | 1        | 16.906      | 75.539   | .000    | .070                | 75.539            | 1.000                       |       |
| L. iners                          |                    | 49.900                  | 1        | 49.900      | 265.303  | .000    | .210                | 265.303           | 1.000                       |       |
| HPV                               |                    | 16.373                  | 1        | 16.373      | 65.726   | .000    | .062                | 65.726            | 1.000                       |       |
| HV                                |                    | 8.618                   | 1        | 8.618       | 59.656   | .000    | .056                | 59.656            | 1.000                       |       |
| Age                               |                    | 111983.192              | 1        | 111983.192  | 1201.065 | .000    | .546                | 1201.065          | 1.000                       |       |
| Last Sex                          |                    | 3.136                   | 1        | 3.136       | 8.915    | .003    | .009                | 8.915             | .845                        |       |
| Sex Partners                      |                    | 934.770                 | 1        | 934.770     | 52.118   | .000    | .050                | 52.118            | 1.000                       |       |
| Pregnancies                       |                    | 847.514                 | 1        | 847.514     | 164.916  | .000    | .142                | 164.916           | 1.000                       |       |
| BirthC                            |                    | 34.419                  | 1        | 34.419      | 156.294  | .000    | .135                | 156.294           | 1.000                       |       |
| Pills                             |                    | 7.326                   | 1        | 7.326       | 31.919   | .000    | .031                | 31.919            | 1.000                       |       |
| Insect                            |                    | 15.733                  | 1        | 15.733      | 65.445   | .000    | .061                | 65.445            | 1.000                       |       |
| Condom                            |                    | .375                    | 1        | .375        | 9.543    | .002    | .009                | 9.543             | .870                        |       |
| Implants                          |                    | .955                    | 1        | .955        | 9.042    | .003    | .009                | 9.042             | .852                        |       |
| Loop                              |                    | .529                    | 1        | .529        | 8.591    | .003    | .009                | 8.591             | .834                        |       |
| Natural                           |                    | .003                    | 1        | .003        | .260     | .611    | .000                | .260              | .080                        |       |
| STI                               |                    | 6.263                   | 1        | 6.263       | 37.010   | .000    | .036                | 37.010            | 1.000                       |       |
| M genitalium                      |                    | Cytology                | .009     | 1           | .009     | .006    | .940                | .000              | .006                        | .051  |
|                                   |                    | Ureaplasma spp.         | .494     | 1           | .494     | 1.976   | .160                | .002              | 1.976                       | .290  |
|                                   | M. hominis         | 1.146                   | 1        | 1.146       | 5.119    | .024    | .005                | 5.119             | .618                        |       |
|                                   | L. iners           | .077                    | 1        | .077        | .411     | .522    | .000                | .411              | .098                        |       |
|                                   | HPV                | .026                    | 1        | .026        | .103     | .749    | .000                | .103              | .062                        |       |
|                                   | HV                 | 1.912                   | 1        | 1.912       | 13.233   | .000    | .013                | 13.233            | .953                        |       |
|                                   | Age                | 178.258                 | 1        | 178.258     | 1.912    | .167    | .002                | 1.912             | .282                        |       |
|                                   | Last Sex           | .226                    | 1        | .226        | .840     | .424    | .001                | .840              | .128                        |       |
|                                   | Sex Partners       | .007                    | 1        | .007        | .000     | .984    | .000                | .000              | .050                        |       |
|                                   | Pregnancies        | 1.087                   | 1        | 1.087       | .212     | .646    | .000                | .212              | .075                        |       |
|                                   | BirthC             | .064                    | 1        | .064        | .290     | .590    | .000                | .290              | .084                        |       |
|                                   | Pills              | .300                    | 1        | .300        | 1.306    | .253    | .001                | 1.306             | .208                        |       |
|                                   | Insect             | .124                    | 1        | .124        | .515     | .473    | .001                | .515              | .111                        |       |
|                                   | Condom             | .063                    | 1        | .063        | 1.612    | .204    | .002                | 1.612             | .245                        |       |
|                                   | Implants           | .013                    | 1        | .013        | .122     | .727    | .000                | .122              | .064                        |       |
|                                   | Loop               | .019                    | 1        | .019        | .300     | .584    | .000                | .300              | .085                        |       |
|                                   | Natural            | .003                    | 1        | .003        | .260     | .611    | .000                | .260              | .080                        |       |
|                                   | STI                | 1.915                   | 1        | 1.915       | 11.319   | .001    | .011                | 11.319            | .919                        |       |
|                                   | Error              | Cytology                | 1489.592 | 1080        | 1.480    |         |                     |                   |                             |       |
|                                   |                    | Ureaplasma spp.         | 249.782  | 1080        | .250     |         |                     |                   |                             |       |
| M. hominis                        |                    | 223.895                 | 1080     | .224        |          |         |                     |                   |                             |       |
| L. iners                          |                    | 188.047                 | 1080     | .188        |          |         |                     |                   |                             |       |
| HPV                               |                    | 245.188                 | 1080     | .249        |          |         |                     |                   |                             |       |
| HV                                |                    | 144.467                 | 1080     | .144        |          |         |                     |                   |                             |       |
| Age                               |                    | 92396.592               | 1080     | 93.237      |          |         |                     |                   |                             |       |
| Last Sex                          |                    | 353.379                 | 1080     | .353        |          |         |                     |                   |                             |       |
| Sex Partners                      |                    | 17935.487               | 1080     | 17.935      |          |         |                     |                   |                             |       |
| Pregnancies                       |                    | 5139.078                | 1080     | 5.139       |          |         |                     |                   |                             |       |
| BirthC                            |                    | 220.220                 | 1080     | .220        |          |         |                     |                   |                             |       |
| Pills                             |                    | 229.556                 | 1080     | .230        |          |         |                     |                   |                             |       |
| Insect                            |                    | 245.366                 | 1080     | .240        |          |         |                     |                   |                             |       |
| Condom                            |                    | 39.259                  | 1080     | .039        |          |         |                     |                   |                             |       |
| Implants                          |                    | 105.616                 | 1080     | .106        |          |         |                     |                   |                             |       |
| Loop                              |                    | 61.634                  | 1080     | .062        |          |         |                     |                   |                             |       |
| Natural                           |                    | 11.853                  | 1080     | .012        |          |         |                     |                   |                             |       |
| STI                               |                    | 169.218                 | 1080     | .166        |          |         |                     |                   |                             |       |
| Total                             |                    | Cytology                | 4340.000 | 1082        |          |         |                     |                   |                             |       |
|                                   |                    | Ureaplasma spp.         | 516.000  | 1082        |          |         |                     |                   |                             |       |
|                                   | M. hominis         | 341.000                 | 1082     |             |          |         |                     |                   |                             |       |
|                                   | L. iners           | 751.000                 | 1082     |             |          |         |                     |                   |                             |       |
|                                   | HPV                | 464.000                 | 1082     |             |          |         |                     |                   |                             |       |
|                                   | HV                 | 178.000                 | 1082     |             |          |         |                     |                   |                             |       |
|                                   | Age                | 1564112.000             | 1082     |             |          |         |                     |                   |                             |       |
|                                   | Last Sex           | 414.000                 | 1082     |             |          |         |                     |                   |                             |       |
|                                   | Sex Partners       | 29263.000               | 1082     |             |          |         |                     |                   |                             |       |
|                                   | Pregnancies        | 16187.000               | 1082     |             |          |         |                     |                   |                             |       |
|                                   | BirthC             | 675.000                 | 1082     |             |          |         |                     |                   |                             |       |
|                                   | Pills              | 397.000                 | 1082     |             |          |         |                     |                   |                             |       |
|                                   | Insect             | 401.000                 | 1082     |             |          |         |                     |                   |                             |       |
|                                   | Condom             | 41.000                  | 1082     |             |          |         |                     |                   |                             |       |
|                                   | Implants           | 120.000                 | 1082     |             |          |         |                     |                   |                             |       |
|                                   | Loop               | 66.000                  | 1082     |             |          |         |                     |                   |                             |       |
|                                   | Natural            | 12.000                  | 1082     |             |          |         |                     |                   |                             |       |
|                                   | STI                | 188.000                 | 1082     |             |          |         |                     |                   |                             |       |
|                                   | Corrected Total    | Cytology                | 1489.601 | 1081        |          |         |                     |                   |                             |       |
|                                   |                    | Ureaplasma spp.         | 250.275  | 1081        |          |         |                     |                   |                             |       |
| M. hominis                        |                    | 224.951                 | 1081     |             |          |         |                     |                   |                             |       |
| L. iners                          |                    | 188.125                 | 1081     |             |          |         |                     |                   |                             |       |
| HPV                               |                    | 245.134                 | 1081     |             |          |         |                     |                   |                             |       |
| HV                                |                    | 146.379                 | 1081     |             |          |         |                     |                   |                             |       |
| Age                               |                    | 93414.850               | 1081     |             |          |         |                     |                   |                             |       |
| Last Sex                          |                    | 353.955                 | 1081     |             |          |         |                     |                   |                             |       |
| Sex Partners                      |                    | 17935.494               | 1081     |             |          |         |                     |                   |                             |       |
| Pregnancies                       |                    | 5140.165                | 1081     |             |          |         |                     |                   |                             |       |
| BirthC                            |                    | 220.284                 | 1081     |             |          |         |                     |                   |                             |       |
| Pills                             |                    | 229.895                 | 1081     |             |          |         |                     |                   |                             |       |
| Insect                            |                    | 245.520                 | 1081     |             |          |         |                     |                   |                             |       |
| Condom                            |                    | 39.322                  | 1081     |             |          |         |                     |                   |                             |       |
| Implants                          |                    | 105.629                 | 1081     |             |          |         |                     |                   |                             |       |
| Loop                              |                    | 61.653                  | 1081     |             |          |         |                     |                   |                             |       |
| Natural                           |                    | 11.856                  | 1081     |             |          |         |                     |                   |                             |       |
| STI                               |                    | 171.134                 | 1081     |             |          |         |                     |                   |                             |       |

- a. R Squared = .000 (Adjusted R Squared = -.001)
- b. R Squared = .002 (Adjusted R Squared = .001)
- c. R Squared = .005 (Adjusted R Squared = .004)
- d. R Squared = .000 (Adjusted R Squared = -.001)
- e. R Squared = .000 (Adjusted R Squared = -.001)
- f. R Squared = .013 (Adjusted R Squared = .012)
- g. R Squared = .002 (Adjusted R Squared = .001)
- h. R Squared = .001 (Adjusted R Squared = .000)
- i. R Squared = .000 (Adjusted R Squared = -.001)
- j. R Squared = .000 (Adjusted R Squared = -.001)
- k. R Squared = .000 (Adjusted R Squared = -.001)
- l. R Squared = .001 (Adjusted R Squared = .000)
- m. R Squared = .001 (Adjusted R Squared = .000)
- n. R Squared = .002 (Adjusted R Squared = .001)
- o. R Squared = .000 (Adjusted R Squared = -.001)
- p. R Squared = .000 (Adjusted R Squared = -.001)
- q. R Squared = .000 (Adjusted R Squared = -.001)
- r. R Squared = .011 (Adjusted R Squared = .010)
- s. Computed using alpha = .05

E

**Tests of Between-Subjects Effects**

| Source          | Dependent Variable | Type III Sum of Squares | df       | Mean Square | F         | Sig.     | Partial Eta Squared | Nonscent. Parameter | Observed Power <sup>a</sup> |       |
|-----------------|--------------------|-------------------------|----------|-------------|-----------|----------|---------------------|---------------------|-----------------------------|-------|
| Corrected Model | Cytology           | 2.975 <sup>a</sup>      | 1        | 2.975       | 2.001     | .158     | .002                | 2.001               | .293                        |       |
|                 | M. genitalium      | .008 <sup>b</sup>       | 1        | .008        | .411      | .522     | .000                | .411                | .098                        |       |
|                 | Ureaplasma spp.    | 4.244 <sup>c</sup>      | 1        | 4.244       | 17.252    | .000     | .017                | 17.252              | .988                        |       |
|                 | M. hominis         | 4.601 <sup>d</sup>      | 1        | 4.601       | 20.980    | .000     | .020                | 20.980              | .995                        |       |
|                 | HPV                | 5.185 <sup>e</sup>      | 1        | 5.185       | 21.254    | .000     | .021                | 21.254              | .996                        |       |
|                 | HSV                | .714 <sup>f</sup>       | 1        | .714        | 4.901     | .027     | .005                | 4.901               | .599                        |       |
|                 | Age                | 2314.393 <sup>g</sup>   | 1        | 2314.393    | 25.405    | .000     | .025                | 25.405              | .999                        |       |
|                 | Last Sex           | 3.423 <sup>h</sup>      | 1        | 3.423       | 9.776     | .002     | .010                | 9.776               | .878                        |       |
|                 | Sex Partners       | 38.343 <sup>i</sup>     | 1        | 38.343      | 2.142     | .144     | .002                | 2.142               | .310                        |       |
|                 | Pregnancies        | 54.660 <sup>j</sup>     | 1        | 54.660      | 10.788    | .001     | .011                | 10.788              | .907                        |       |
|                 | BiHC               | .348 <sup>k</sup>       | 1        | .348        | 1.581     | .209     | .002                | 1.581               | .241                        |       |
|                 | Pills              | .001 <sup>l</sup>       | 1        | .001        | .004      | .948     | .000                | .004                | .050                        |       |
|                 | Inject             | .580 <sup>m</sup>       | 1        | .580        | 2.419     | .120     | .002                | 2.419               | .343                        |       |
|                 | Condom             | .057 <sup>n</sup>       | 1        | .057        | 1.448     | .229     | .001                | 1.448               | .225                        |       |
|                 | Implants           | .050 <sup>o</sup>       | 1        | .050        | .471      | .493     | .000                | .471                | .105                        |       |
|                 | Loop               | .106 <sup>p</sup>       | 1        | .106        | 1.723     | .190     | .002                | 1.723               | .259                        |       |
|                 | Natural            | .021 <sup>q</sup>       | 1        | .021        | 1.807     | .179     | .002                | 1.807               | .269                        |       |
|                 | STI                | .011 <sup>r</sup>       | 1        | .011        | .064      | .800     | .000                | .064                | .057                        |       |
|                 | Intercept          | Cytology                | 2221.023 | 1           | 2221.023  | 1494.002 | .000                | .598                | 1494.002                    | 1.000 |
|                 |                    | M. genitalium           | .280     | 1           | .280      | 13.620   | .000                | .013                | 13.620                      | .958  |
| Ureaplasma spp. |                    | 171.570                 | 1        | 171.570     | 697.350   | .000     | .411                | 697.350             | 1.000                       |       |
| M. hominis      |                    | 68.313                  | 1        | 68.313      | 310.022   | .000     | .237                | 310.022             | 1.000                       |       |
| HPV             |                    | 133.786                 | 1        | 133.786     | 648.425   | .000     | .354                | 648.425             | 1.000                       |       |
| HSV             |                    | 19.816                  | 1        | 19.816      | 136.036   | .000     | .120                | 136.036             | 1.000                       |       |
| Age             |                    | 1155523.622             | 1        | 1155523.622 | 12884.059 | .000     | .927                | 12884.059           | 1.000                       |       |
| Last Sex        |                    | 58.645                  | 1        | 58.645      | 167.470   | .000     | .143                | 167.470             | 1.000                       |       |
| Sex Partners    |                    | 7946.487                | 1        | 7946.487    | 444.008   | .000     | .307                | 444.008             | 1.000                       |       |
| Pregnancies     |                    | 6893.983                | 1        | 6893.983    | 17064.979 | .000     | .638                | 17064.979           | 1.000                       |       |
| BiHC            |                    | 330.703                 | 1        | 330.703     | 1503.627  | .000     | .601                | 1503.627            | 1.000                       |       |
| Pills           |                    | 95.219                  | 1        | 95.219      | 414.346   | .000     | .293                | 414.346             | 1.000                       |       |
| Inject          |                    | 112.317                 | 1        | 112.317     | 488.108   | .000     | .319                | 488.108             | 1.000                       |       |
| Condom          |                    | 1.807                   | 1        | 1.807       | 25.645    | .000     | .025                | 25.645              | .999                        |       |
| Implants        |                    | 10.074                  | 1        | 10.074      | 95.414    | .000     | .387                | 95.414              | 1.000                       |       |
| Loop            |                    | 3.879                   | 1        | 3.879       | 63.018    | .000     | .059                | 63.018              | 1.000                       |       |
| Natural         |                    | .065                    | 1        | .065        | 5.518     | .019     | .005                | 5.518               | .651                        |       |
| STI             |                    | 13.041                  | 1        | 13.041      | 76.208    | .000     | .071                | 76.208              | 1.000                       |       |
| Liners          |                    | Cytology                | 2.975    | 1           | 2.975     | 2.001    | .158                | .002                | 2.001                       | .293  |
|                 |                    | M. genitalium           | .008     | 1           | .008      | .411     | .522                | .000                | .411                        | .098  |
|                 | Ureaplasma spp.    | 4.244                   | 1        | 4.244       | 17.252    | .000     | .017                | 17.252              | .988                        |       |
|                 | M. hominis         | 4.601                   | 1        | 4.601       | 20.980    | .000     | .020                | 20.980              | .995                        |       |
|                 | HPV                | 5.185                   | 1        | 5.185       | 21.254    | .000     | .021                | 21.254              | .996                        |       |
|                 | HSV                | .714                    | 1        | .714        | 4.901     | .027     | .005                | 4.901               | .599                        |       |
|                 | Age                | 2314.393                | 1        | 2314.393    | 25.405    | .000     | .025                | 25.405              | .999                        |       |
|                 | Last Sex           | 3.423                   | 1        | 3.423       | 9.776     | .002     | .010                | 9.776               | .878                        |       |
|                 | Sex Partners       | 38.343                  | 1        | 38.343      | 2.142     | .144     | .002                | 2.142               | .310                        |       |
|                 | Pregnancies        | 54.660                  | 1        | 54.660      | 10.788    | .001     | .011                | 10.788              | .907                        |       |
|                 | BiHC               | .348                    | 1        | .348        | 1.581     | .209     | .002                | 1.581               | .241                        |       |
|                 | Pills              | .001                    | 1        | .001        | .004      | .948     | .000                | .004                | .050                        |       |
|                 | Inject             | .580                    | 1        | .580        | 2.419     | .120     | .002                | 2.419               | .343                        |       |
|                 | Condom             | .057                    | 1        | .057        | 1.448     | .229     | .001                | 1.448               | .225                        |       |
|                 | Implants           | .050                    | 1        | .050        | .471      | .493     | .000                | .471                | .105                        |       |
|                 | Loop               | .106                    | 1        | .106        | 1.723     | .190     | .002                | 1.723               | .259                        |       |
|                 | Natural            | .021                    | 1        | .021        | 1.807     | .179     | .002                | 1.807               | .269                        |       |
|                 | STI                | .011                    | 1        | .011        | .064      | .800     | .000                | .064                | .057                        |       |
|                 | Error              | Cytology                | 1486.626 | 1000        | 1.487     |          |                     |                     |                             |       |
|                 |                    | M. genitalium           | 20.551   | 1000        | .021      |          |                     |                     |                             |       |
| Ureaplasma spp. |                    | 246.031                 | 1000     | .246        |           |          |                     |                     |                             |       |
| M. hominis      |                    | 220.350                 | 1000     | .220        |           |          |                     |                     |                             |       |
| HPV             |                    | 243.949                 | 1000     | .244        |           |          |                     |                     |                             |       |
| HSV             |                    | 145.665                 | 1000     | .146        |           |          |                     |                     |                             |       |
| Age             |                    | 91100.458               | 1000     | 91.100      |           |          |                     |                     |                             |       |
| Last Sex        |                    | 350.182                 | 1000     | .350        |           |          |                     |                     |                             |       |
| Sex Partners    |                    | 17897.151               | 1000     | 17.897      |           |          |                     |                     |                             |       |
| Pregnancies     |                    | 5585.305                | 1000     | 5.585       |           |          |                     |                     |                             |       |
| BiHC            |                    | 219.937                 | 1000     | .220        |           |          |                     |                     |                             |       |
| Pills           |                    | 229.804                 | 1000     | .230        |           |          |                     |                     |                             |       |
| Inject          |                    | 239.939                 | 1000     | .240        |           |          |                     |                     |                             |       |
| Condom          |                    | 36.385                  | 1000     | .036        |           |          |                     |                     |                             |       |
| Implants        |                    | 105.079                 | 1000     | .106        |           |          |                     |                     |                             |       |
| Loop            |                    | 61.547                  | 1000     | .062        |           |          |                     |                     |                             |       |
| Natural         |                    | 11.835                  | 1000     | .012        |           |          |                     |                     |                             |       |
| STI             |                    | 171.123                 | 1000     | .171        |           |          |                     |                     |                             |       |
| Total           |                    | Cytology                | 4240.000 | 1002        |           |          |                     |                     |                             |       |
|                 |                    | M. genitalium           | 21.000   | 1002        |           |          |                     |                     |                             |       |
|                 | Ureaplasma spp.    | 516.000                 | 1002     |             |           |          |                     |                     |                             |       |
|                 | M. hominis         | 341.000                 | 1002     |             |           |          |                     |                     |                             |       |
|                 | HPV                | 484.000                 | 1002     |             |           |          |                     |                     |                             |       |
|                 | HSV                | 178.000                 | 1002     |             |           |          |                     |                     |                             |       |
|                 | Age                | 1564112.000             | 1002     |             |           |          |                     |                     |                             |       |
|                 | Last Sex           | 414.000                 | 1002     |             |           |          |                     |                     |                             |       |
|                 | Sex Partners       | 29263.000               | 1002     |             |           |          |                     |                     |                             |       |
|                 | Pregnancies        | 16187.000               | 1002     |             |           |          |                     |                     |                             |       |
|                 | BiHC               | 675.000                 | 1002     |             |           |          |                     |                     |                             |       |
|                 | Pills              | 357.000                 | 1002     |             |           |          |                     |                     |                             |       |
|                 | Inject             | 481.000                 | 1002     |             |           |          |                     |                     |                             |       |
|                 | Condom             | 41.000                  | 1002     |             |           |          |                     |                     |                             |       |
|                 | Implants           | 120.000                 | 1002     |             |           |          |                     |                     |                             |       |
|                 | Loop               | 66.000                  | 1002     |             |           |          |                     |                     |                             |       |
|                 | Natural            | 12.000                  | 1002     |             |           |          |                     |                     |                             |       |
|                 | STI                | 188.000                 | 1002     |             |           |          |                     |                     |                             |       |
|                 | Corrected Total    | Cytology                | 1489.601 | 1001        |           |          |                     |                     |                             |       |
|                 |                    | M. genitalium           | 20.560   | 1001        |           |          |                     |                     |                             |       |
| Ureaplasma spp. |                    | 250.275                 | 1001     |             |           |          |                     |                     |                             |       |
| M. hominis      |                    | 224.951                 | 1001     |             |           |          |                     |                     |                             |       |
| HPV             |                    | 249.134                 | 1001     |             |           |          |                     |                     |                             |       |
| HSV             |                    | 146.279                 | 1001     |             |           |          |                     |                     |                             |       |
| Age             |                    | 93414.850               | 1001     |             |           |          |                     |                     |                             |       |
| Last Sex        |                    | 353.605                 | 1001     |             |           |          |                     |                     |                             |       |
| Sex Partners    |                    | 17935.484               | 1001     |             |           |          |                     |                     |                             |       |
| Pregnancies     |                    | 5146.165                | 1001     |             |           |          |                     |                     |                             |       |
| BiHC            |                    | 220.284                 | 1001     |             |           |          |                     |                     |                             |       |
| Pills           |                    | 229.805                 | 1001     |             |           |          |                     |                     |                             |       |
| Inject          |                    | 240.520                 | 1001     |             |           |          |                     |                     |                             |       |
| Condom          |                    | 36.322                  | 1001     |             |           |          |                     |                     |                             |       |
| Implants        |                    | 105.029                 | 1001     |             |           |          |                     |                     |                             |       |
| Loop            |                    | 61.653                  | 1001     |             |           |          |                     |                     |                             |       |
| Natural         |                    | 11.856                  | 1001     |             |           |          |                     |                     |                             |       |
| STI             |                    | 171.134                 | 1001     |             |           |          |                     |                     |                             |       |

a. R Squared = .002 (Adjusted R Squared = .001)  
 b. R Squared = .000 (Adjusted R Squared = -.001)  
 c. R Squared = .017 (Adjusted R Squared = .016)  
 d. R Squared = .020 (Adjusted R Squared = .019)  
 e. R Squared = .021 (Adjusted R Squared = .020)  
 f. R Squared = .015 (Adjusted R Squared = .014)  
 g. R Squared = .025 (Adjusted R Squared = .024)  
 h. R Squared = .010 (Adjusted R Squared = .009)  
 i. R Squared = .002 (Adjusted R Squared = .001)  
 j. R Squared = .011 (Adjusted R Squared = .010)  
 k. R Squared = .002 (Adjusted R Squared = .001)  
 l. R Squared = .000 (Adjusted R Squared = -.001)  
 m. R Squared = .002 (Adjusted R Squared = .001)  
 n. R Squared = .001 (Adjusted R Squared = .000)  
 o. R Squared = .000 (Adjusted R Squared = -.001)  
 p. R Squared = .002 (Adjusted R Squared = .001)  
 q. R Squared = .002 (Adjusted R Squared = .001)  
 r. R Squared = .000 (Adjusted R Squared = -.001)  
 s. Computed using alpha = .05

5

6 **Figure S1.** MANOVA Results. (A). MANOVA analysis of factors in relationship cervical cytology; (B).  
 7 MANOVA analysis of factors in relationship to *Ureaplasma spp.* detection; (C). MANOVA analysis of factors in  
 8 relationship to *M. hominis* detection; (D). MANOVA analysis of factors in relationship to *M. genitalium* detection;  
 9 (E). MANOVA analysis of factors in relationship to *L. iners* detection.

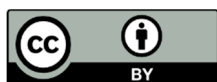

© 2020 by the authors. Submitted for possible open access publication under the terms and conditions of the Creative Commons Attribution (CC BY) license (<http://creativecommons.org/licenses/by/4.0/>).
